# Supplementary material
Source: Springer Nature journal article supplement (https://www.springermedizin.de/resource/supplementary/12885_2012_3625_MOESM2_ESM.pdf/9464632)

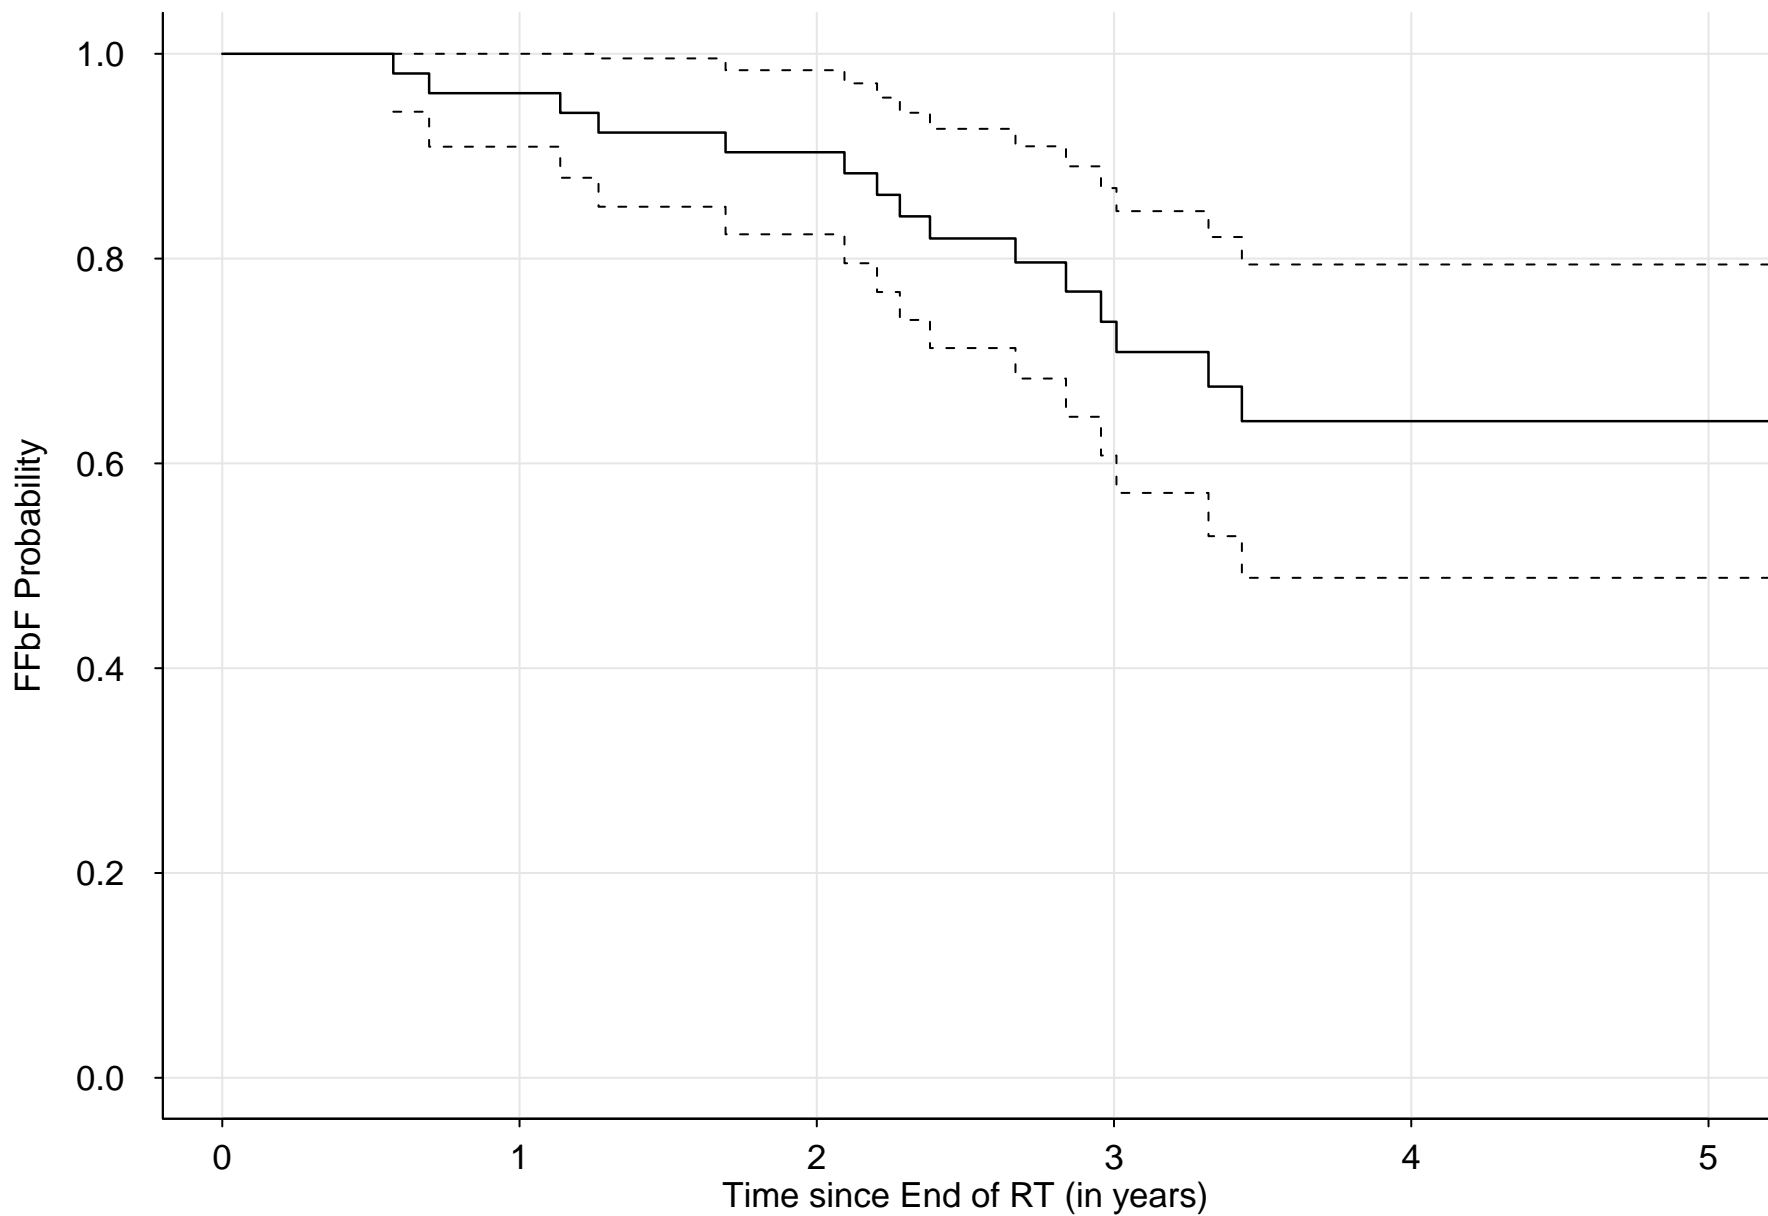

|             |    |    |    |    |    |   |
|-------------|----|----|----|----|----|---|
| N at Risk   | 52 | 50 | 47 | 25 | 11 | 8 |
| N of Events | 0  | 2  | 3  | 7  | 3  | 0 |

Supplement: MOESM2 [file 9464632]
